# Supplementary material for: Effect of polyvinylpyrrolidone (PVP) on palladium catalysts for direct synthesis of hydrogen peroxide from hydrogen and oxygen
Source: Royal Society of Chemistry journal article supplement (doi:10.1039/d0ra03148h), 2020-01-01
Supplement: d0ra03148h1.pdf [file d0ra03148h1.pdf]

## Supporting Materials

### Effect of Polyvinylpyrrolidone (PVP) on Palladium Catalyst for Direct Synthesis of Hydrogen Peroxide from Hydrogen and Oxygen

Geun-Ho Han,<sup>a</sup> Seok-Ho Lee,<sup>a</sup> Myung-gi Seo,<sup>a,b,\*\*</sup> Kwan-Young Lee<sup>a,c,\*</sup>

<sup>a</sup> Department of Chemical and Biological Engineering, Korea University, 145 Anam-ro, Seoul 02841, Republic of Korea.

<sup>b</sup> Lotte Chemical, 115 Gajeongbuk-ro, Daejeon 34110, Republic of Korea.

<sup>c</sup> Graduate School of Energy and Environment (KU-KIST Green School), Korea University, Seoul 02841, Republic of Korea.

\* Corresponding author (K.-Y. Lee)

Tel: +82-2-3290-3299; Fax: +82-2-926-6102; E-mail: kylee@korea.ac.kr

\*\* Cocompanying author (M.-g. Seo)

Tel: +82-2-3290-3727; Fax: +82-2-926-6102; E-mail: bluebird677@gmail.com

**Table S1.** Catalytic activities for Pd/SiO<sub>2</sub> and Pd-PVP catalysts under different reduction conditions.

| Catalysts           | Reduction Temperature (°C) | H <sub>2</sub> conversion (%) | H <sub>2</sub> O <sub>2</sub> selectivity (%) | H <sub>2</sub> O <sub>2</sub> production rate (mmol <sub>H<sub>2</sub>O<sub>2</sub></sub> g <sub>Pd</sub> <sup>-1</sup> h <sup>-1</sup> ) |
|---------------------|----------------------------|-------------------------------|-----------------------------------------------|-------------------------------------------------------------------------------------------------------------------------------------------|
| Pd/SiO <sub>2</sub> | 60                         | 12.8                          | 31.1                                          | 702.5                                                                                                                                     |
|                     | 150                        | 15.7                          | 26.8                                          | 750.3                                                                                                                                     |
| Pd-PVP(1)           | 60                         | 13.2                          | 42.4                                          | 1001.4                                                                                                                                    |
|                     | 150                        | 13.4                          | 41.8                                          | 987.6                                                                                                                                     |
| Pd-PVP(2)           | 60                         | 8.2                           | 44.4                                          | 652.3                                                                                                                                     |
|                     | 150                        | 8.3                           | 42.7                                          | 624.5                                                                                                                                     |
| Pd-PVP(3)           | 60                         | 5.4                           | 51.9                                          | 503.2                                                                                                                                     |
|                     | 150                        | 5.6                           | 51.2                                          | 509.4                                                                                                                                     |

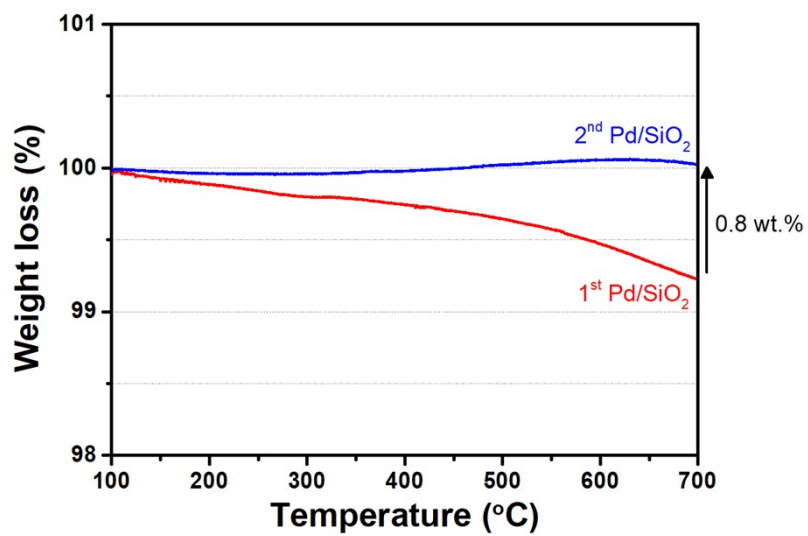

**Figure S1.** TGA data of fresh Pd/SiO<sub>2</sub> (1<sup>st</sup> Pd/SiO<sub>2</sub>) and successive second run of 1<sup>st</sup> Pd/SiO<sub>2</sub> (2<sup>nd</sup> Pd/SiO<sub>2</sub>).

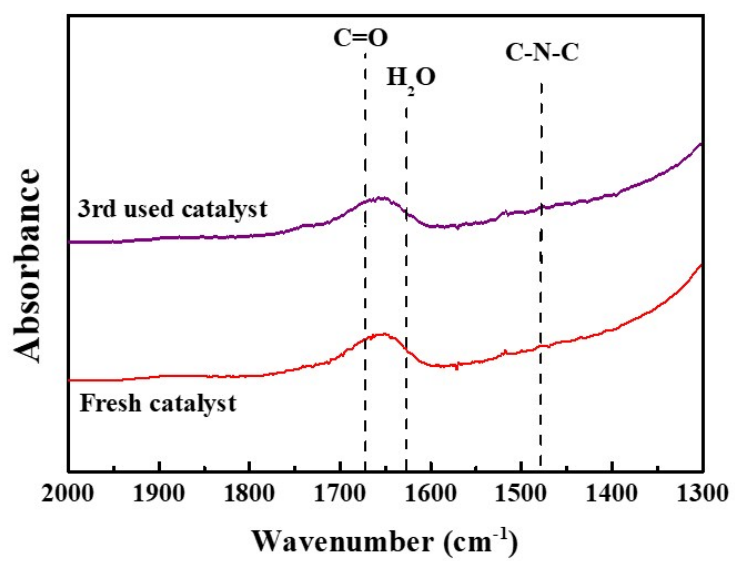

**Figure S2.** FT-IR spectra of fresh Pd-PVP(1) and 3<sup>rd</sup> used Pd-PVP(1) in the range between 2000-1300 cm<sup>-1</sup> that contains bonds indicating PVP.
